# Supplementary material
Source: MDPI journal article supplement (https://www.mdpi.com/2073-4441/13/7/916)
Supplement: s1 [file s1]

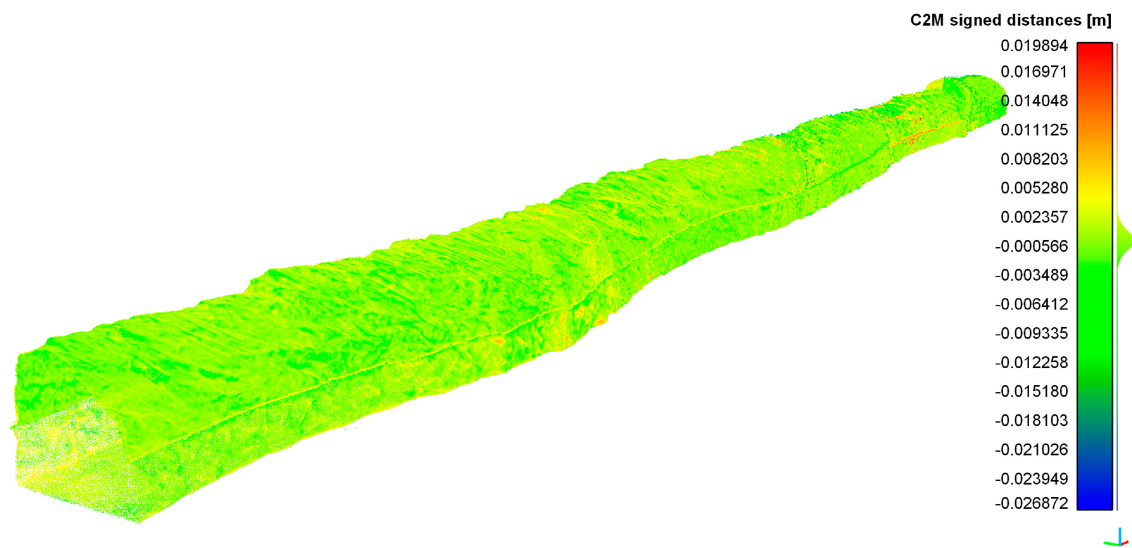

Figure S1: Difference plot between the milling mesh and the coated SfM point cloud defining the digital twin of the Bjørndal 1 model. Note the different colour scale compared to Figure 4 and Figure S2.

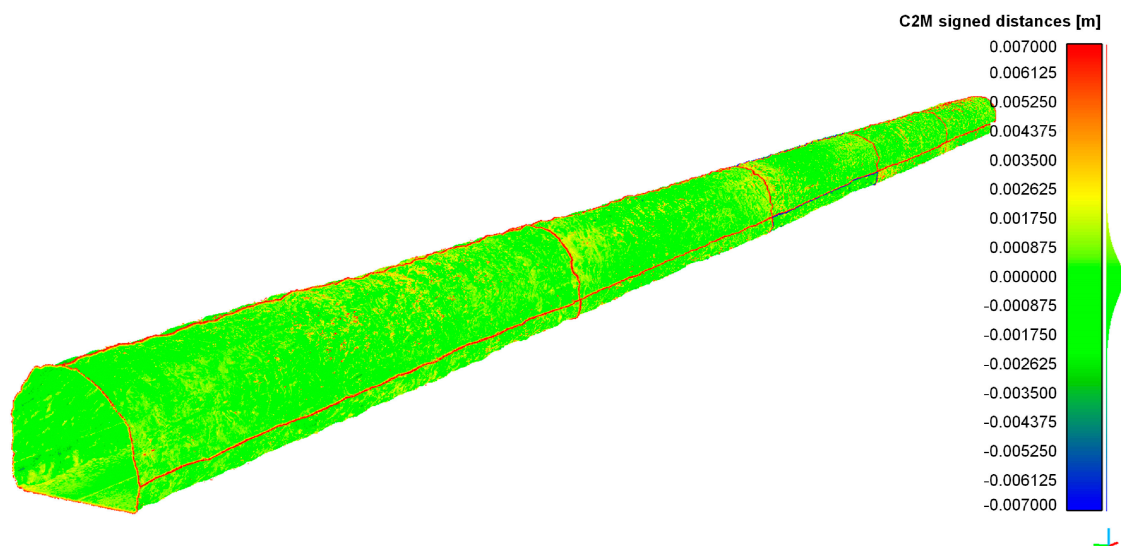

Figure S2: Difference plot between the milling mesh and the coated SfM point cloud defining the digital twin of the Grøndal model. Note the different colour scale compared to Figure 4 and Figure S1.
